# Supplementary material for: Insight into Calcium-Binding Motifs of Intrinsically Disordered Proteins
Source: MDPI journal article supplement (doi:10.3390/biom11081173), 2021-08-09
Supplement: s1 [file s1]

## Insight into calcium-binding motifs of intrinsically disordered proteins

Estella A. Newcombe <sup>1,3</sup>, Catarina B. Fernandes <sup>1,2</sup>, Jeppe E. Lundsgaard <sup>1,2</sup>, Inna Brakti <sup>1,2</sup>, Kresten Lindorff-Larsen <sup>1</sup>, Annette E. Langkilde <sup>3</sup>, Karen Skriver <sup>1,2</sup>, and Birthe B. Kragelund <sup>1,2\*</sup>

### SUPPORTING TABLES

Table S1 – Protein sequences

Table S2 – Protein purification and production methodology

### SUPPORTING FIGURES

Figure S1 – ANAC046<sub>172-338</sub> secondary chemical shifts.

Figure S2 – Amide HSQCs for proteins in the presence and absence of calcium chloride

Figure S3 – Scatchard plots for proteins and SM1-4 peptides, measured via OCPC assay

Figure S4 – SM1-4 peptide TOCSY, ROESY, and amide HSQCs spectra with assignments in the presence and absence of calcium chloride

**Table S1 – Protein Sequences**

| Protein                    | Sequence                                                                                                                                                                                  |
|----------------------------|-------------------------------------------------------------------------------------------------------------------------------------------------------------------------------------------|
| aSN <sub>96-140</sub>      | KKDQL GKNEEGAPQE GILEDMPVDP DNEAYEMPSE EGYQDYEPEA                                                                                                                                         |
| aSN <sub>1-140</sub>       | MDVFMKGLSK AKEGVVAAAE KTKQGVAAEA GKTKEGVLYV GSKTKEGVVH GVATVAEKT<br>EQVTNVGGAV VTGLTAVAQK TVEGAGSIAA ATGFVKKDQL GKNEEGAPQE GILEDMPVDP<br>DNEAYEMPSE EGYQDYEPEA                            |
| ANAC046 <sub>172-338</sub> | NAPSTTIT TKQLSRIDSL DNIDHLLDFS SLPPLIDPGF LGQPGPSFSG ARQQHDLKP<br>LHHPTTAPVD NTYLPQTALN FPYHSVHNSG SDFGYGAGSG NNNKGMKLE HSLVSVSQT<br>GLSSDVNTTA TPEISSYPMM MNPAMMDGSK SACDGLDDLI FWEDLYTS |
| NHE1 <sub>680-815</sub>    | I NNYLTVPAHK LDSPTMSRAR IGSDPLAYEP KEDLPVITID PASPQSPESV<br>DLVNEELKGG VLGLSRDPAK VAEDEDDDG GIMMRSKETS SPGTDDVFTP APSDSPSSQR<br>IQRLSDPGP HPEPGEGERF FPKGQ                                |
| DSS1wt                     | MSRAALPSLE NLEDDDEFED FATENWPMKD TELDTGDDTL WENNWDDEDI GDDDFSVQLQ<br>AELKKKGVA C                                                                                                          |
| ProTα                      | MSDAAVDTSS EITTKDLKEK KEVVEEAENG RDAPANGNAE NEENGEQEA NEVDEEEEEE<br>GEEEEEEEG DGEEDGDGD EEAESATGKR AAEDDEDDDV DTKKQKTDED D                                                                |

**Table S2 – Protein Purification and Production Methodology**

| Protein                    | IPTG (mM) | Lysis/binding buffer                                                             | Wash buffer                                                                       | Elution buffer                                                                     | Cleavage buffer                                            |
|----------------------------|-----------|----------------------------------------------------------------------------------|-----------------------------------------------------------------------------------|------------------------------------------------------------------------------------|------------------------------------------------------------|
| aSN <sub>96-140</sub>      | 1         | 50 mM Tris (pH 8.0),<br>150 mM NaCl,<br>10 mM Imidazole                          | 50 mM Tris (pH 8.0),<br>1 M NaCl,<br>10 mM Imidazole                              | 50 mM Tris (pH 8.0),<br>150 mM NaCl,<br>250 mM Imidazole                           | 50 mM Tris (pH 8.0),<br>150 mM NaCl                        |
| ANAC046 <sub>172-338</sub> | 1         | 20 mM NaH <sub>2</sub> PO <sub>4</sub> pH 7.0,<br>500 mM NaCl,<br>5 mM Imidazole | 20 mM NaH <sub>2</sub> PO <sub>4</sub> pH 7.0,<br>500 mM NaCl,<br>20 mM Imidazole | 20 mM NaH <sub>2</sub> PO <sub>4</sub> pH 7.0,<br>500 mM NaCl,<br>300 mM Imidazole | 20 mM NaH <sub>2</sub> PO <sub>4</sub> pH 7.0,<br>1 mM DTT |
| DSS1wt, swap, E, D         | 0.1       | 50 mM Tris (pH 8.0),<br>150 mM NaCl,<br>10 mM Imidazole                          | 50 mM Tris (pH 8.0),<br>1 M NaCl,<br>10 mM Imidazole,<br>1mM β-mercaptoethanol    | 50 mM Tris (pH 8.0),<br>1 M NaCl,<br>250 mM Imidazole,<br>1mM β-mercaptoethanol    | 50 mM Tris (pH 8.0),<br>150 mM NaCl,<br>1 mM DTT           |

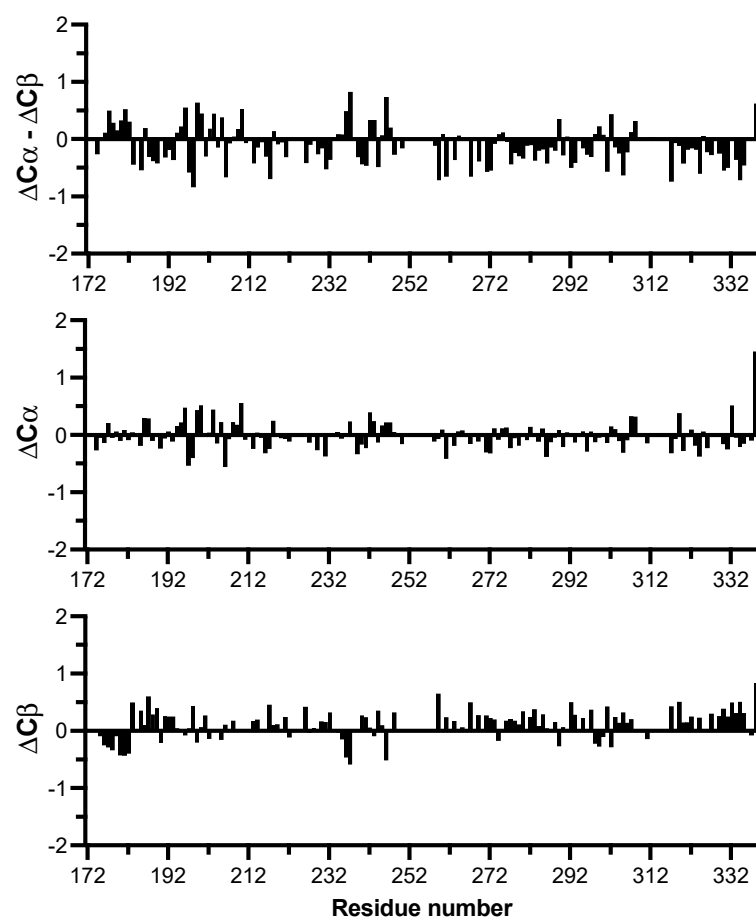

**Figure S1.** ANAC046<sub>172-338</sub> secondary chemical shifts. Calculated using random coil chemical shifts for IDPs [65-67].

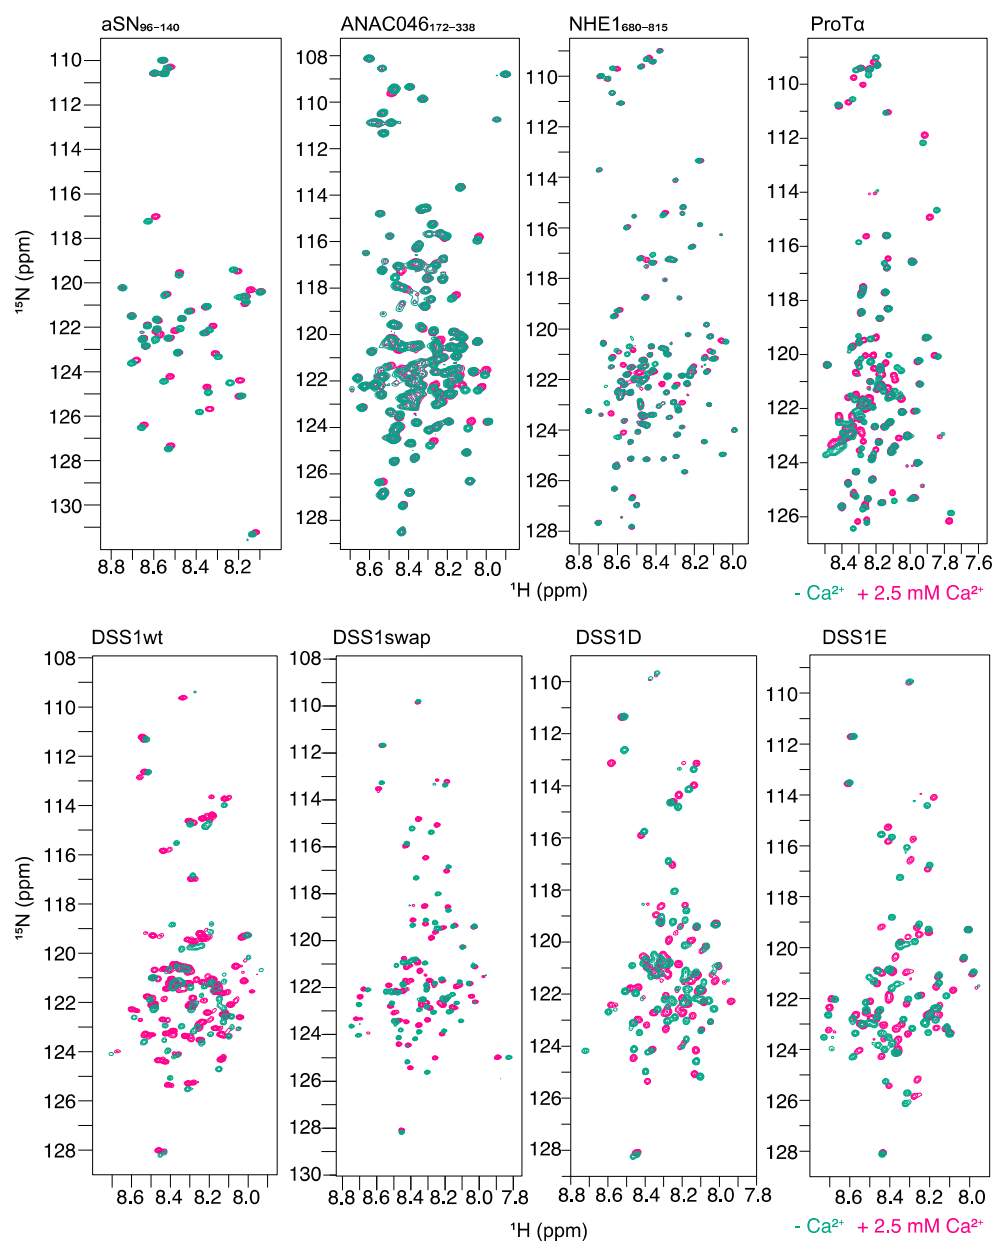

**Figure S2.** Amide HSQC spectra of all proteins tested, with (pink) and without (teal) calcium. Assignments can be found using the following BMRB accession numbers: ANAC046<sub>172-338</sub>: 51033; NHE1<sub>680-815</sub>: 27812; ProTα: 27215; DSS1: 27618. aSN assignment as described previously [28].

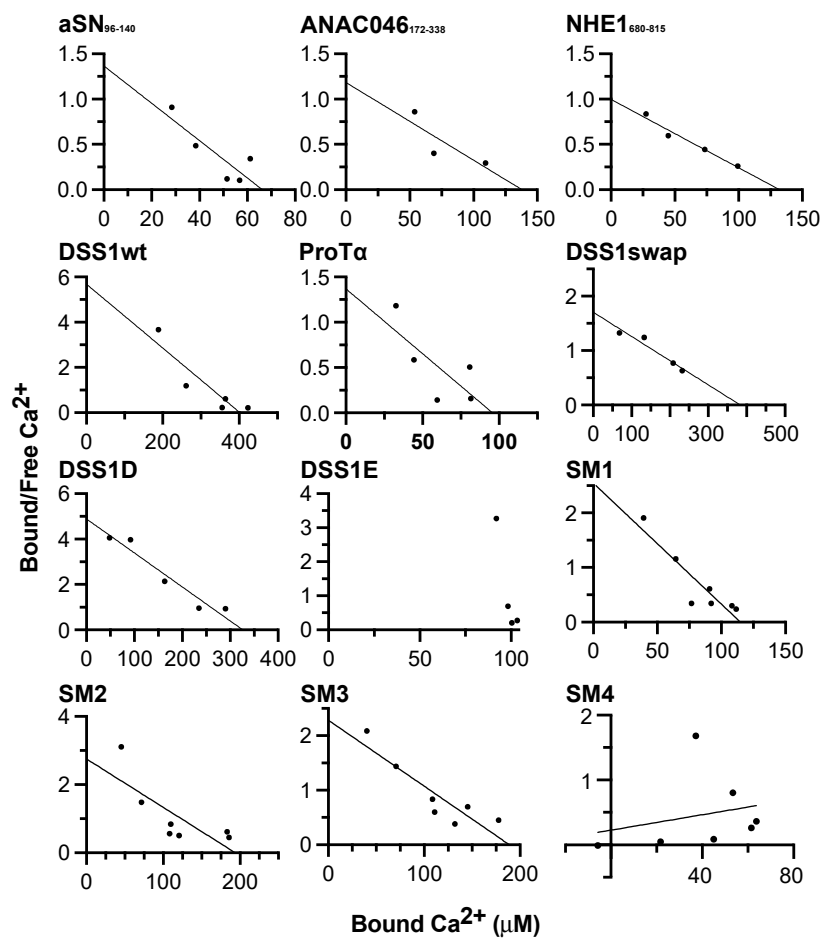

**Figure S3.** Scatchard plots of proteins (100  $\mu\text{M}$ ; ProT $\alpha$ : 10  $\mu\text{M}$ ) and SM1-4 (200  $\mu\text{M}$ ) with extrapolated linear regression. Buffer conditions for OCPC assay: Tris-HCl (15 mM) pH 8.0.

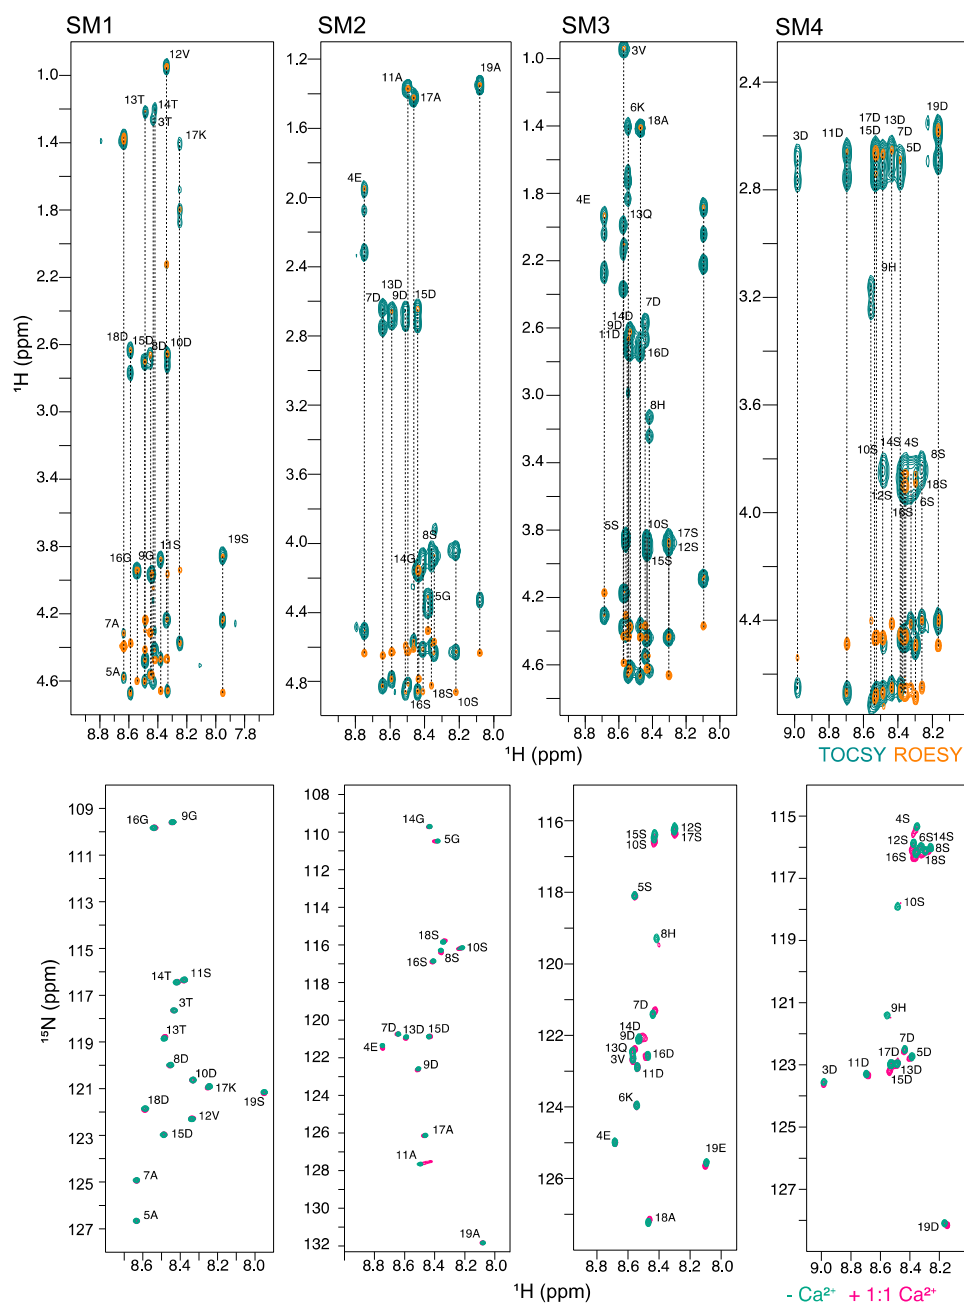

**Figure S4.** TOCSY (teal) and ROESY (orange) fingerprint regions for SM1-4, as used for peptide assignment (upper panels). Amide HSQC spectra of SM1-4, with (pink) and without (teal) calcium (lower panels).

**Reference:**

65. Kjaergaard, M.; Poulsen, F.M. Sequence correction of random coil chemical shifts: Correlation between neighbor correction factors and changes in the Ramachandran distribution. *J. Biomol. NMR* **2011**, *50*, 157–165, doi:10.1007/s10858-011-9508-2.
66. Kjaergaard, M.; Brander, S.; Poulsen, F.M. Random coil chemical shift for intrinsically disordered proteins: Effects of temperature and pH. *J. Biomol. NMR* **2011**, *49*, 139–149, doi:10.1007/s10858-011-9472-x.
67. Schwarzing, S.; Kroon, G.J.A.; Foss, T.R.; Chung, J.; Wright, P.E.; Dyson, H.J. Sequence-dependent correction of random coil NMR chemical shifts. *J. Am. Chem. Soc.* **2001**, *123*, 2970–2978, doi:10.1021/ja003760i.
